# Supplementary material for: Identification, Recovery, and Refinement of Hitherto Undescribed Population-Level Genomes from the Human Gastrointestinal Tract
Source: Front Microbiol. 2016 Jun 21;7:884. doi: 10.3389/fmicb.2016.00884 (PMC4914512; doi:10.3389/fmicb.2016.00884)
Supplement: Supplementary file 2 [file Data_Sheet_1.XLSX]

## Sheet: genomeAnalyses
				Melainabacteria MEL A1	Melainabacteria MEL B1	Melainabacteria-like CLSG01	Melainabacteria-like CLSG02	Melainabacteria-like CLSG03	Alphaproteobacteria-like MGS00153	Tenericutes/Firmicutes-like MGS00248	Clostridiales-like MGS00113-CG02
	RAST ID			6666666.50238	6666666.50242	6666666.163354	6666666.163355	6666666.155161	6666666.163363	6666666.163364	6666666.163361
	#contig			1	21	47	83	551	157	113	408
	# bp			1,867,336	2,302,759	1871540	2180307	1916257	1954779	1555611	2970300
	# CDS			1828	2239	1848	2139	1876	2049	1410	2605
		# RNA encoding CDS		45	45	39	44	24	43	39	45
		# protein encoding CDS		1783	2194	1809	2095	1852	2006	1371	2560
		# gene encoding hypothetical protein (%)		865 (47.3)	1084 (48.4)	864 (46.7)	1007 (47.1)	961 (51.2)	1060 (51.7)	560 (39.7)	799 (30.7)
	Completeness: # of gene (%)			106 (99.1)	106 (99.1)	106 (99.1)	106 (99.1)	81 (75.7)	105 (98.1)	76 (67.3)	102 (95.3)
	Conatmination: # of gene (%)			3 (2.8)	3 (2.8)	3 (2.8)	3 (2.8)	3 (2.8)	1 (0.9)	1 (0.9)	17 (15.9)
	G+C%			32.95	35.33	32.25	35.21	35.98	50.81	30.48	44.49
	Subsystem coverage
		% covered		35	33	36	36	27	29	36	45
		% not covered		65	67	64	64	73	71	64	55
	Subsystem feature count (%)			967 (100)	1097 (100)	991 (100)	1113 (100)	672 (100)	750 (100)	653 (100)	1818 (100)
		Cofactors, Vitamins, Prosthetic Groups, Pigments		121 (12.5)	131 (11.9)	126 (12.7)	129 (11.6)	79 (11.8)	8 (1.1)	26 (4)	191 (10.5)
		Cell Wall and Capsule		81 (8.4)	92 (8.4)	69 (7)	96 (8.6)	54 (8)	73 (9.7)	36 (5.5)	113 (6.2)
		Virulence, Disease and Defense		37 (3.8)	40 (3.6)	35 (3.5)	41 (3.7)	23 (3.4)	34 (4.5)	30 (4.6)	59 (3.2)
		Potassium metabolism		7 (0.7)	13 (1.2)	6 (0.6)	12 (1.1)	8 (1.2)	10 (1.3)	10 (1.5)	21 (1.2)
		Photosynthesis		0 (0.0)	0 (0.0)	0 (0)	0 (0)	0 (0)	0 (0)	0 (0)	0 (0)
		Miscellaneous		4 (0.4)	8 (0.7)	8 (0.8)	10 (0.9)	11 (1.6)	20 (2.7)	2 (0.3)	14 (0.8)
		Phages, Prophages, Transposable elements, Plasmids		1 (0.1)	3 (0.3)	1 (0.1)	2 (0.2)	4 (0.6)	9 (1.2)	1 (0.2)	0 (0)
		Membrane Transport		28 (2.9)	33 (3)	35 (3.5)	39 (3.5)	15 (2.2)	26 (3.5)	30 (4.6)	50 (2.8)
		Iron acquisition and metabolism		0 (0.0)	0 (0.0)	0 (0)	0 (0)	0 (0)	0 (0)	0 (0)	1 (0.1)
		RNA Metabolism		69 (7.1)	70 (6.4)	68 (6.9)	66 (6)	44 (6.5)	93 (12.4)	105 (16.1)	100 (5.5)
		Nucleosides and Nucleotides		37 (3.8)	22 (2)	38 (3.8)	22 (2)	30 (4.5)	30 (4)	42 (6.4)	94 (5.2)
		Protein Metabolism		188 (19.4)	185 (16.9)	173 (17.5)	186 (16.7)	103 (15.3)	165 (22)	84 (12.9)	161 (8.8)
		Cell Division and Cell Cycle		19 (2)	22 (2)	21 (2.1)	19 (1.7)	18 (2.7)	26 (3.5)	18 (2.7)	38 (2.1)
		Motility and Chemotaxis		0 (0)	18 (1.6)	0 (0)	18 (1.6)	0 (0)	0 (0)	2 (0.3)	91 (5)
		Regulation and Cell signaling		10 (1)	9 (0.8)	8 (0.8)	11 (1)	7 (1)	6 (0.8)	3 (0.5)	18 (1)
		Secondary Metabolism		0 (0)	0 (0)	0 (0)	0 (0)	0 (0)	1 (0.1)	0 (0)	4 (0.2)
		DNA Metabolism		77 (8)	82 (7.5)	77 (7.8)	75 (6.7)	50 (7.4)	73 (9.7)	60 (9.2)	124 (6.8)
		Fatty Acids, Lipids, and Isoprenoids		53 (5.5)	58 (5.3)	76 (7.7)	78 (7)	18 (2.7)	18 (2.4)	33 (5.1)	74 (4.1)
		Nitrogen Metabolism		4 (0.4)	7 (0.6)	4 (0.4)	10 (0.9)	2 (0.3)	0 (0)	0 (0)	9 (0.5)
		Dormancy and Sporulation		3 (0.3)	4 (0.4)	3 (0.3)	3 (0.3)	3 (0.4)	2 (0.3)	3 (0.5)	55 (3)
		Respiration		2 (0.2)	26 (2.4)	10 (1)	13 (1.2)	14 (2.1)	22 (2.9)	10 (1.5)	19 (1)
		Stress Response		37 (3.8)	31 (2.8)	32 (3.2)	31 (2.8)	28 (4.2)	39 (5.2)	10 (1.5)	44 (2.4)
		Metabolism of Aromatic Compounds		1 (0.1)	1 (0.1)	1 (0.1)	1 (0.1)	2 (0.3)	0 (0)	0 (0)	1 (0.1)
		Amino Acids and Derivatives		92 (9.5)	109 (9.9)	108 (10.9)	122 (11)	79 (11.8)	23 (3.1)	35 (5.4)	228 (12.5)
		Sulfur Metabolism		2 (0.2)	1 (0.1)	1 (0.1)	1 (0.1)	2 (0.3)	2 (0.3)	2 (0.3)	23 (1.3)
		Phosphorus Metabolism		1 (0.1)	37 (3.4)	6 (0.6)	27 (2.4)	1 (0.1)	21 (2.8)	6 (0.9)	54 (3)
		Carbohydrates		93 (9.6)	95 (8.7)	85 (8.6)	101 (9)	77 (11.5)	49 (6.5)	105 (16)	232 (12.8)
	rRNA (complete or patial)			2x16S; 2x23S	5S; 16S; 23S	-	5S; 23S	-	2x16S	-	4x16S; 23S
	tRNA			41	42	39	42	24	41	39	40
	anticodon for:
		Alanine		TGC	GGA; TGC	TGC	GGC; TGC	GGA; TGC	CGC; GGC	CGC; GGC; TGC	-
		Arginine		ACG; CCG; CCT; TCT	ACG; CCG; CCT; TCT	ACG; CCG; CCT; TCT; TCT	ACG; CCG; CCT; TCT	ACG; CCG; CCT; TCT	ACG; CCT; CCG; TCT	ACG; CCG; CCT; TCT	ACG; CCG; CCT; TCT
		Asparagine		GTT	GTT	GTT	GTT	-	GTT	-	GTT; GTT
		Aspartic acid		GTC	GTC	GTC	GTC	-	GTC	GTC	GTC
		Cysteine		GCA	GCA	GCA	GCA	-	GCA	GCA	GCA
		Glutamic acid		CTC; TTC	CTC; TTC	CTC; TTC	CTC; TTC	CTC; TTC	CTC; TTC	CTC	CTC; TTC
		Glutamine		CTG; TTG	CTG; TTG	TTG	CTG; TTG	CTG; TTG	CTG; TTG	CTG; TTG	CTG; TTG
		Glycine		CCC; GCC; TCC	CCC; GCC; TCC	CCC; GCC; TCC	CCC; GCC; TCC	CCC; TCC	CCC; GCC; TCC	GCC; TCC	CCC; GCC; TCC
		Histidine		GTG	GTG	GTG	GTG	-	GTG	GTG	GTG
		Isoleucine		GAT	GAT	GAT	GAT	GAT	-	GAT	-
		Leucine		CAA; CAG; GAG; TAA; TAG	CAA; CAG; GAG; TAA; TAG	CAA; CAG; GAG; TAA; TAG	CAA; CAG; GAG; TAA; TAG	CAA; CAG; TAA	CAA; CAG; GAG; TAA; TAG	CAA; GAG; TAA; TAG	AAG; CAA; CAA; CAG; TAA; TAG
		Lysine		CTT; TTT	CTT; TTT	CTT; TTT	CTT; TTT	CTT; TTT	CTT; TTT	CTT; CTT; TTT	CTT; TTT
		Methionine		CAT; CAT; CAT	CAT; CAT; CAT	CAT; CAT; CAT	CAT; CAT; CAT	CAT	CAT; CAT; CAT	CAT; CAT; CAT	CAT; CAT; CAT; CAT
		Phenylalanine		GAA	GAA	GAA	GAA	-	-	-	-
		Proline		CGG; TGG	CGG; TGG	CGG; TGG	CGG; TGG	CGG	CGG; GGG; TGG	CGG; GGG; TGG	CGG; TGG
		Serine		CGA; GGA; GCT; TGA	CGA; GCT; GGA; TGA	GCT; GGA; TGA	CGA; GGA; GTC; TGA	GCT; TGA	CGA; GCT; GGA; TGA	CGA	CGA; GCT; TGA
		Threonine		CGA; GGT; TGT	CGT; GGT; TGT	CGT; GGT ; TGT	CGT; GGT; TGT	-	CGT; GGT; TGT	CGT; GGT; TGT	CGT; GGT; GGT; TGT
		Tryptophan		CCA	CCA	CCA	CCA	CCA	CCA	CCA	CCA
		Tyrosine		GTA	GTA	GTA	GTA	-	GTA	GTA	-
		Valine		GAC; TAC	GAC; TAC	TAC	GAC; TAC	TAC	GAC; TAC	CAC; TAC	TAC; TAC
		Pseudo		-	-	-	-	-	-	GCT; GGA	-
	Central carbon metabolism
		Fermentation		fermentation to ethanol and formate	fermentation to ethanol, lactate and formate (formate efflux transporter: peg.510)	fermentation to ethanol	fermentation to ethanol, lactate and formate (formate efflux transporter: peg.1174)	fermentation to ethanol	fermentation to ethnol and acetate	fermentation to ethanol, formate and acetate	fermentation to ethanol, formate, lactate and acetate production (formate efflux transporter: peg.725)
			Acetaldehyde dehydrogenase/alcohol dehydrogenase EC: 1.2.1.10/1.1.1.1	peg.293 ; peg.758	peg.93	peg.433; peg.848	peg.2024	-	-	peg.513	-
			Alcohol dehydrogenase EC: 1.1.1.1	peg.292 ; peg.487; peg.1207	peg.267 ; peg.570 ; peg.645 ; per.1492	peg.340; peg.434; peg.1071	peg.166; peg.895; peg.1188	peg.1129; peg.1326; peg.1469	peg.1903	-	peg.3; peg.597; peg.733, peg.1080
			Lactate dehydrogenase EC: 1.1.1.28	-	peg.534	-	peg.877	-	-	-	peg.123; peg.946
			Pyruvate formate lyase EC: 2.3.1.54	peg.1709 ; peg.1710	peg.373 ; peg.374 ; peg.1153	-	peg.532; peg.1497; peg.1498	-	-	peg.749	peg.1589
			Pyruvate formate-lyase activating enzyme EC: 1.97.1.4	peg.1708	peg.388	peg.222	peg.1487	-	-	peg.748	peg.1588
			Phosphate acetyltransferase EC: 2.3.1.8	-	-	-	-	-	peg.341		peg.1022; peg.1913
			Acetate kinase EC: 2.7.2.1	-	-	-	-	-	peg.342	peg.1125	peg.1914; peg.2317
		Sugar transportation
			Multiple sugar transporter	peg.720	peg.993	-	peg.453	peg.1310	-	peg.81; peg.361; peg.364; peg.620; peg.638; peg.782; peg.895; peg.1091	peg.1806; peg.2031; peg.2032; peg.2033; peg.2286
			Maltose transporter	peg.497	peg.876	peg.664	peg.1957	peg.924	-	peg.83; peg.84; peg.116; peg.117; peg.118; peg.785	-
			Cellobiose phophotransferase	peg.170	peg.2129	peg.1530	peg.632	peg.333	-	-	peg.1631
			Other phospotransferase	-	-	-	-	-	-	-	peg.144; peg.1379; peg.1381
			N-Acetyl-D-glucosamine ABC transport system	peg.136; peg.243; peg.602; peg.979; peg.1481	peg.259; peg.1202; peg.1008; peg.2095	peg.225; peg.1307; peg.1386; peg.1659	peg.486; peg.667; peg.755; peg.1625	peg.441; peg.11440; peg.1838	-	peg.375; peg.376; peg.622; peg.623; peg.624; peg.635; peg.636; peg.637; peg.1090	-
			(Other) sugar transporter, symporter or permease	peg.135; peg.1638	peg.471; peg.1156; peg.1827	peg.815; peg.901; peg.1151; peg.1385	peg.529; peg.1276; peg.1408; peg.1723	peg.212; peg.442; peg.650	peg.1476	peg.358; peg.360; peg.784; peg.786; peg.1092	peg.366; peg.367; peg.368;peg.1309; peg.1310; peg.1314; peg.1317; peg.1318; peg.1763; peg.1765; peg.1767; peg.2145
		EMP pathway		COMPLETE	COMPLETE	COMPLETE	COMPLETE	COMPLETE	COMPLETE	INCOMPLETE	COMPLETE
			Glucokinase EC: 2.7.1.2	peg.861 ; peg.1280 ; peg.1283 ; peg.1776	peg.1686	peg.1335; peg.1807	peg.869; peg1076	peg.1309	peg.779	peg.1255	peg.624
			Glucose-6-phosphate isomerase EC: 5.3.1.9	peg.270 ; peg.1144	peg.1539 ; peg.1825	peg.806; peg.1837	peg.1278; peg.1800	peg.406	peg.1551	peg.352	peg.1565
			Phosphofructokinase EC: 2.7.1.11	-	-	-	-	-	peg.1428	peg.239	peg.809; peg.923; peg.1773
			Pyrophosphate-dependent fructose 6-phosphate-1-kinase EC: 2.7.1.90	peg.1284	peg.492	peg.705	peg.428	peg.1035	-	-	-
			Fructose-bisphosphate aldolase EC: 4.1.2.13	peg.821	peg.817	peg.122	peg.113	peg.204	peg.899	peg.101; peg.1311	peg.997
			Triosephosphate isomerase EC: 5.3.1.1	peg.1037	peg.1621	peg.711	peg.1184	peg.1132	peg.1539	peg.724	peg.1086; peg.2062
			Glyceraldehyde-3-phosphate dehydrogenase EC: 1.2.1.12	peg.458	peg.34	peg.599	peg.253	peg.185	peg.773	peg.88	peg.2064
			Phosphoglycerate kinase EC: 2.7.2.3	peg.1339	peg.1647	peg.879	peg.348	peg.1128	peg.774	peg.723	peg.1085; peg.2063
			2,3-bisphosphoglycerate-independent phosphoglycerate mutase EC: 5.4.2.1	peg.156	peg.1976	peg.81	peg.2070	peg.1336	peg.1730	peg.349	peg.1088; peg.1861; peg.2538
			Enolase EC: 4.2.1.11	peg.1130	peg.639	peg.789	peg.172	peg.1149	peg.1261	peg.1290	peg.1092; peg.1562; peg.2126
			Pyruvate kinase EC: 2.7.1.40	peg.349	peg.916	peg.1410	peg.1918	peg.1552	peg.879; peg.880	-	peg.408
		Pentose phosphate pathway		INCOMPLETE	INCOMPLETE	INCOMPLETE	INCOMPLETE	INCOMPLETE	INCOMPLETE	INCOMPLETE	INCOMPLETE
			Glucose-6-phosphate dehydrogenase EC: 1.1.1.49	-	-	-	-	-	-	-	-
			6- phosphogluconolactonase EC: 3.1.1.31	-	-	-	-	-	-	-	-
			6-phosphogluconate dehydrogenase EC: 1.1.1.44	-	-	-	-	-	-	-	-
			Ribulose-5-phosphate 3-Epimerase EC: 5.1.3.1	peg.1514	peg.2060	peg.1634	peg.701	peg.1509	peg.904	peg.949	peg.1683
			Ribose-5-phosphate Isomerase EC: 5.3.1.6	peg.332	peg.1972	peg.1655	peg.2074	peg.1476	peg.409	peg.386	peg.165; peg.2151
			Transketolase EC: 2.2.1.1	peg.39 ; peg.573	peg.1029 ; peg.1103	peg.1523; peg.1563	peg.388; peg.832	peg.589; peg.1794	peg.898	peg.527	peg.414
			Transaldolase EC: 2.2.1.2	-	-	-	-	-	-	peg322	-
		TCA cycle		INCOMPLETE	INCOMPLETE	INCOMPLETE	INCOMPLETE	INCOMPLETE	INCOMPLETE	INCOMPLETE	INCOMPLETE
			Pyruvate dehydrogenase EC: 1.2.4.1	-	-	-	-	-	-	-	-
			Citrate synthase EC: 2.3.3.1	-	-	-	-	-	-	-	peg.50; peg.635
			Aconitase EC: 4.2.1.3	peg.233	peg.1131	peg.1822	peg.555	peg.1283	-	-	-
			Isocitrate dehydrogenase EC: 1.1.1.41	-	peg.748	peg.394	peg.36	-	-	-	-
			Isocitrate dehydrogenase EC: 1.1.1.42	-	-	-	-	-		-	peg.771
			2-oxoacid:ferredoxin oxidoreductase EC: 1.2.7.3	peg.1385-7 (alpha, beta, gamma SU)	peg.838-40 (alpha, beta, gamma SU); peg.2179-82 (alpha, beta, delta, gamma SU)	peg.1196-9 (gamma, beta, alpha, delta SU)	peg.608-11 (alpha, beta, gamma, delta SU)	peg.774-§ (delta, alpha, beta SU)	-	-	-
			Succinyl-CoA synthetase EC: 6.2.1.5	-	-	-	-	-	peg.463; peg.462	-	-
			Succinate dehydrogenase EC: 1.3.5.1	-	-	-	-	-	-	-	-
			Fumarase EC: 4.2.1.2	-	-	-	-	-	-	-	peg.1525; peg.1527
			Malate dehydrogenase EC: 1.1.1.37	-	-	-	-	-	-	-	-
			Phosphoenolpyruvate carboxykinase EC: 4.1.1.32	-	-	-	-	-	-	-	-
		Entner-Doudoroff Pathway		INCOMPLETE	INCOMPLETE	INCOMPLETE	INCOMPLETE	INCOMPLETE	INCOMPLETE	INCOMPLETE	INCOMPLETE
			6- phosphogluconolactonase EC: 3.1.1.31	-	-	-	-	-	-	-	-
			phosphogluconate dehydratase EC: 4.2.1.12	-	-	-	-	-	-	-	-
			2-dehydro-3-deoxyphosphogluconate aldolase / (4S)-4-hydroxy-2-oxoglutarate aldolase EC: 4.1.2.14 / 4.1.3.42 or 2-dehydro-3-deoxy-phosphogluconate/2-dehydro-3-deoxy-6-phosphogalactonate aldolase EC: 4.1.2.55	peg.327	peg.1177	peg.1847	peg.510	-	-	-	-
			2-dehydro-3-deoxygluconate kinase EC: 2.7.1.45	peg.326	peg.1178	peg.1846	peg.509	peg.183	-	-	-
			Glyceraldehyde-3-phosphate dehydrogenase EC: 1.2.1.12	peg.458	peg.34	peg.599	peg.253	peg.185	peg.773	peg.88	peg.2064
			Phosphoglycerate kinase EC: 2.7.2.3	peg.1339	peg.1647	peg.879	peg.348	peg.1128	peg.774	peg.723	peg.1085; peg.2063
			2,3-bisphosphoglycerate-independent phosphoglycerate mutase EC: 5.4.2.1	peg.156	peg.1976	peg.81	peg.2070	peg.1336	peg.1730	peg.349	peg.1088; peg.1861; peg.2538
			Enolase EC: 4.2.1.11	peg.1130	peg.639	peg.789	peg.172	peg.1149	peg.1261	peg.1290	peg.1092; peg.1562; peg.2126
			Pyruvate kinase EC: 2.7.1.40	peg.349	peg.916	peg.1410	peg.1918	peg.1552	peg.879; peg.880	-	peg.408
	Oxidative phosphorylation
		Electron transport chain		ABSCENT	INCOMPLETE	INCOMPLETE	INCOMPLETE	INCOMPLETE	INCOMPLETE	ABSCENT	INCOMPLETE
			nuoA - NADH dehydrogenase, subunit A; EC: 1.6.5.3	-	peg.1417	-	peg.1115	-	-	-	-
			nuoB - NADH dehydrogenase, subunit B; EC: 1.6.5.3	-	peg.1418	-	peg.1116	-	-	-	-
			nuoC - NADH:ubiquinone oxidoreductase, 27kD subunit; EC: 1.6.5.3	-	peg.1419	-	peg.1117	-	-	-	-
			nuoD - NADH:ubiquinone oxidoreductase, 49kD subunit; EC: 1.6.5.3	-	peg.1420	-	peg.1118	-	-	-	-
			nuoE - NADH:ubiquinone oxidoreductase, 24kD subunit; EC: 1.6.5.3	-	-	-	-	-	-	-	-
			nuoF - NAD(P)-dependent iron only hydrogenase diaphorase compnent flavoprotein; EC: 1.6.5.3	-	-	-	-	-	-	-	-
			nuoG - NAD(P)-dependent iron only hydrogenase catalytic subunit; EC: 1.6.5.3	-	-	-	-	-	-	-	-
			nuoH - NADH dehydrogenase subunit H; EC: 1.6.5.3	-	peg.1421	-	peg.1119	-	-	-	-
			nuoI - NADH-quinone oxidoreductase, chain I; EC: 1.6.5.3	-	peg.1422	-	- (peg.1120 by BLAST search)	-	-	-	-
			nuoJ - NADH:ubiquinone oxidoreductase, subunit 6 (chain J); EC: 1.6.5.3	-	peg.1423	-	peg.1121	-	-	-	-
			nuoK - NADH-quinone oxidoreductase, chain K; EC: 1.6.5.3	-	peg.1424	-	- (peg.1122 by BLAST search)	-	-	-	-
			nuoL - NADH-quinone oxidoreductase, chain L; EC: 1.6.5.3	-	peg.1425	-	peg.1123	-	-	-	-
			nuoM - Proton-translocating NADH-quinone oxidoreductase, chain M	-	peg.1426	-	peg.1124	-	peg.284	-	-
			nuoN - NADH dehydrogenase, subunit N; EC: 1.6.5.3	-	peg.1427	-	peg.1125	-	peg.285	-	-
			ndhF - NADH:ubiquinone oxidoreductase, subunit 5 (chain L)/Multisubunit Na+/H+ antiporter, MnhA subunit; EC: 1.6.5.3	-	-	-	-	-	-	-	-
			sdhA - succiante dehydrogenase, subunit A; EC: 1.3.5.1/1.3.99.1	-	-	-	-	-	-	-	-
			sdhB - succiante dehydrogenase, subunit B; EC: 1.3.5.1/1.3.99.1	-	-	-	-	-	-	-	-
			cbbO - Cbb3-type cytochrome oxidase, cytochrome c subunit	-	-	-	-	-	-	-	-
			cbbN - Cbb3-type cytochrome oxidase, subunit 1; EC: 1.9.3.1	-	-	-	-	-	-	-	-
			Pyridine nucleotide-disulfide oxidoreductase; NADH dehydrogenase EC: 1.6.99.3	-	peg.1450	peg.1575	peg.1150	peg.297	-	-	peg.1743
		Electron transport complex Rnf
			rnfA	-	-	-	-	-	peg.303	peg.311	peg.11
			rnfB	-	-	-	-	-	peg.308	peg.309	-
			rnfC	-	-	-	-	-	peg.307	peg.315	peg.8
			rnfD	-	-	-	-	-	peg.306	peg.314	peg.9
			rnfE	-	-	-	-	-	peg.304	peg.312	peg.10
			rnfG	-	-	-	-	-	peg.305	-	-
		ATP synthase		COMPLETE(?)	COMPLETE (?)	COMPLETE (?)	COMPLETE (?)	COMPLETE (?)	COMPLETE (?)	COMPLETE	COMPLETE (?)
			atpA - ATP synthase, F1 subcomplex alpha subunit; EC: 3.6.3.14	peg.175	peg.172	- (probably peg.1728 by BLAST search)	peg.1715	peg.1360	peg.1989	peg.1361	peg.157; peg.1987
			atpB - ATP synthase, F0 sector, subunit a; EC: 3.6.3.14	peg.180	peg.177	- (probably peg.1723 by BLAST search)	peg.1710	- (probably peg.159 by BLAST search)	- (probably peg.1345 by BLAST search)	peg.1357	- (probably peg.1990 and/or peg.161 by BLAST search)
			atpC - ATP synthase, F1 subcomplex epsilon subunit; EC: 3.6.3.14	peg.799	peg.1220	peg.1324	peg.934	peg.826	peg.1986	peg.1364	peg.154
			atpD - ATP synthase, F1 subcomplex beta subunit; EC: 3.6.3.14	peg.800	peg.1221	peg.1323	peg.935	peg.827	peg.1987	peg.1363	peg.155
			atpE - ATP synthase, F0 sector, subunit c; EC: 3.6.3.14	peg.179	peg.176	peg.1724	peg.1711	peg.160	peg.1346	peg.1358	- (probably pe.1989 by BLAST search)
			atpF - ATP synthase, F0 sector, subunit b; EC: 3.6.3.14	- (probably peg.178 by BLAST search)	- (probably peg.175 by BLAST search)	peg.1725	- (probably peg.1712 by BLAST search)	peg.161; peg.162	peg.1347; peg.1348	peg.1359	peg.1988
			atpG - ATP synthase F1, subcomplex gamma subunit b; EC: 3.6.3.14	peg.174	peg.170	peg.1729	peg.1718	peg.1312	peg.1988	peg.1362	peg.156; peg.1986
			atpH - ATP synthase F1, subcomplex delta subunit b; EC: 3.6.3.14	peg.176	peg.173	peg.1727	peg.1714	peg.163	peg.1990	peg.1360	peg.15
		Inorganic phosphatase; EC: 3.6.1.1		peg.1779	peg.36	peg.469	peg.255	peg.1453	peg.626	peg.323?	-
		ppk - polyphosphate kinase 1		-	-	-	-	-	-	-	peg.601; peg.2015
		Vacuolar-type H(+) ATPase subunit H		peg.1539	peg.2062	peg.78	peg.699	peg.1203	-	-	peg.354
	flagellar genes - encoded protein			UNFLAGELLATED	FLAGELLATED	UNFLAGELLATED	FLAGELLATED	UNFLAGELLATED	UNFLAGELLATED	UNFLAGELLATED	FLAGELLATED
			flaA - Flagellin protein	-	peg.253 ; peg.528 ; peg.659 ; peg.971 ; peg.1041 ; peg.1209 ; peg.1833 ; peg.1892 ; peg.1906	-	peg.278; peg.494; peg.792; peg.883; peg.1269; peg.1403; peg.1590; peg.1635; peg.1696; peg.1884	-	-	-	peg.233; peg.253; peg.261; peg.265; peg.2449
			flbB - Flagellar protein	-	-	-	-	-	-	-	peg.2429
			flbD - Flagellar protein	-	-	-	-	-	-	-	peg.2434
			flgA - (Flagellar basal-bodyP-ringformation protein)	-	-	-	-	-	-	-	-
			flgB - Flagellar basal-body rod protein	-	-	-	-	-	-	-	peg.2421
			flgC - Flagellar basal-body rod protein	peg.1595	peg.1767 ; peg.1835	peg.740	peg.1267; peg.1329	peg.383	-	-	peg.2422
			flgD - Flagellar basal-body rod modification protein (Flagellar hook capping protein)	-	peg.1729	-	peg.1365	-	-	-	peg.2431
			flgE - Flagellar hook protein (Flagellar hook-basal protein)	peg.26 ; peg.1593	peg.1728	-	peg.1366	peg.555	-	-	peg.2433
			flgF - Flagellar basal-body rod protein (Flagellar hook-basal body rod protein )	peg.1592	peg.1838	-	peg.1264	peg.386	-	-	peg.248
			flgG - Flagellar basal-body rod protein (Flagellar basal-body rod protein, gram negative bacteria)	-	peg.402 ; peg.403 ; peg.1740 ; peg.1837	peg.737; peg.738; peg.1654	peg.1265; peg.1354; peg.1472; peg.1473	peg.385	-	-	peg.249
			flgH - Flagellar L-ring protein (Flagellar basal body L-ring protein)	-	peg.387	-	peg.1478	-	-	-	-
			flgI - Flagellar P-ring protein (Flagellar basal-body P-ring protein)	-	peg.400	-	peg.1475	-	-	-	-
			flgJ - Flagellar protein (Flagellar protein)	-	-	-		-	-	-	peg.250
			flgK - Flagellar hook-associated protein	-	peg.395	-	peg.1480	-	-	-	peg.256; peg.257
			flgL - Flagellar hook-associated protein (Flagellar hook-associated protein 3)	-	peg.394	-	peg.1481	-		-	peg.258
			fleN - Flagellar synthesis regulator	-	-	-	-	-	peg.1931	-	peg.2448
			flhA - Flagellar biosynthesis protein	peg.725 ; peg 1457	peg.148 ; peg.252 ; peg.1928	peg.704; peg.1177	peg.1633; peg.1752; peg.2120	peg.173; peg.1456	-	-	peg.2446
			flhB - Flagellar biosynthesis protein	peg.31	peg.784 ; peg.1927	peg.952	peg.923; peg.2121	peg.1564	-	-	peg.2297; peg.2445
			flhF - Flagellar biosynthesis protein						peg.1931	-	peg.2447
			fliC - (Flagellin and related hook-associated proteins)	-	-	-	-	-	-	-	-
			fliD - Flagellar hook-associated protein (Flagellar capping protein)	-	peg.899 ; peg.982 ; peg.1516	-	peg.1778; peg.1935	-	-	-	peg.262; peg.480
			fliE -Flagellar hook-basal body complex protein	-	peg.1768	-	peg.1328	-	-	-	peg.2423
			fliF - Flagellar M-ring protein (flagellar basal-body M-ring protein/flagellar hook-basal body protein)	peg.728	peg.217 ; peg.2126	peg.1180	peg.635; peg.1670	-	-	-	peg.2424
			fliG -Flagellar motor switch protein	-	peg.2125	-	peg.636	-	peg.1935	-	peg.2425
			fliH - Flagellar assembly protein (Flagellar biosynthesis/type III secretory pathway protein)	peg.726	peg.253; peg.2124	peg.1178	peg.637; peg.1632	peg.172	-	-	peg.2426
			fliI - Flagellum-specific ATP synthase (type III secretion system ATPase, FliI/YscN)	peg.1480	peg.1084 ; peg.2123	peg.720	peg.319; peg.638	peg.264	-	-	peg.2427
			fliJ - Flagellar protein (flagellar export protein)	-	-	-	-	-	-	-	peg.2428
			fliK - Flagellar hook-length control protein	-	peg.1730 ; peg.1739	-	peg.1355; peg.1364	-	-	-	peg.2430
			fliL - Flagellar biosynthesis protein (Flagellar basal body-associated protein)	-	peg.419	-	peg.1459	-	-	-	-
			fliM - Flagellar motor switch protein	-	peg.418	-	peg.1460	-	-	-	peg.2438
			fliN.spoA - Flagellar motor switch protein	-	peg.417	-	peg.1461	-	peg.1933	-	peg.1030; peg.2439
			fliO - (Flagellar biosynthesis protein)	-	-	-	-	-	-	-	-
			fliP - Flagellar biosynthesis protein	peg.1381	peg.1923 ; peg.2070	peg.939	peg.691; peg.2125	-	-	-	peg.2442
			fliQ - Flagellar biosynthesis protein (Flagellar biosynthesis pathway)	-	peg.1924	-	peg.2124	-	-	-	peg.2443
			fliR - Flagellar biosynthesis protein (Flagellar biosynthesis pathway)	peg.1383	peg.1925 ; peg.2067	peg.941	peg.694; peg.2123	peg.1679	-	-	peg.2444
			fliS - Flagellar biosynthesis protein (Flagellar biosynthetic protein)	-	peg.1601	-	peg.1862	-	-	-	peg.263
			fliT - (Flagelar protiein)	-	-	-	-	-	-	-	-
			fliW - Flagellar assembly factor	-	peg.2222	-	peg.905	-	-	-	peg.259
			motA - Flagellar motor rotation protein (Flagellar motor protein)	-	peg.1640	-	peg.341	-	-	-	peg.2435
			motB - Flagellar motor rotation protein (Flagellar motor protein)	peg.1586	peg.1639	peg.910	peg.340	peg.107	-	-	peg.2436
			ompA - (Flagellar motor protein)	-	-	-	-	-	-	-	-
			RNA polymerase sigma factor for flagellar operon	peg.1587	peg.771 ; peg.783	peg.909; peg.951	peg.11; peg.924	peg.106	-	-	peg.2456
	Vitamins and Cofactors
		FMN		COMPLETE	COMPLETE	COMPLETE	COMPLETE	ABSCENT	ABSCENT	COMPLETE	COMPLETE
			Riboflavin kinase EC: 2.7.1.26	peg.45	peg.1608	peg.293	peg.1869	-	-	peg.1022	peg.2476
		FAD		COMPLETE	COMPLETE	COMPLETE	COMPLETE	ABSCENT	ABSCENT	COMPLETE	COMPLETE
			FMN adenylyltransferase EC: 2.7.7.2	peg.45	peg.1608	peg.293	peg.1869	-	-	peg.1022	peg.2476
		Biotin (vitamin H)		COMPLET	COMPLETE	COMPLETE	COMPLETE	COMPLETE	ABSCENT	ABSCENT	INCOMPLETE
			Pimelate to pimelolyl-CoA: PimeloylCoA synthase EC: 6.2.1.14	-	-	-	-	-	-	-	-
			L-alanine and/or acetate via acetyl-CoA to pimelolyl-CoA (bioC and bioG)	peg.714; peg.713	peg.256; peg.255	peg.1496; peg.1497	peg.1628; peg.1629	peg.1377; peg.1378	-	-	peg.1577; -
			Pimelolyl-CoA to biotine (EC: 2.3.1.47 ; EC: 2.6.1.62 ; EC: 6.3.3.3 ; EC: 2.8.1.6)	peg.712; peg.447; peg.1146; peg.1060	peg.983; peg.1452; peg.762; peg.369	peg.1489; peg.1169 ; peg.1170 + peg.681 ; peg.957	peg.462; peg.1152; peg.1153 + peg.21; peg.1502 + peg.2019	peg.1379; peg.1059; peg.1515; peg.1718	-; -; -; -	-; -; -; -	-; -; -; peg.2586
		Dehydrofolate (DHF) and derivatives		INCOMPLETE	COMPLETE (?)	COMPLETE (?)	COMPLETE (?)	INCOMPLETE	ABSCENT	INCOMPLETE	INCOMPLETE (?)
			GTP to 2-amino-4-hydroxy-6-hydromethyl-7,8-dihydropterine-P2 (EC: 3.5.4.16; folQ; EC: 4.2.1.25; EC: 2.7.6.3)	peg.1802; -; peg.1680; peg.554	peg.595; -; peg.1645; peg.611	peg.284; -; peg.1663; peg.139	peg.215; -; peg.346; peg.202	peg.497; -; peg.388; -	-; -; -; -	peg.652; -; -; -	peg.795; peg.590; - (maybe peg.793 by BLAST search); peg.599
			Chorismate to 4-aminobenzoate (EC: 2.6.3.38; EC: 4.1.3.38)	peg.964; peg.963	peg.1232; peg.1233	peg.921; peg 920	peg.947; peg.948	peg.512; peg.513	-; -	-; -	peg.2531; -
			4-aminobenzoate + 2-amino-4-hydroxy-6-hydromethyl-7,8-dihydropterine-P2 to DHF (EC: 2.5.1.15; EC: 2.3.2.12/2.3.2.17)	peg.1512; -	peg.228; peg.2016	peg.1167; peg1451	peg.1659; peg.748	peg.987; peg.1832	-; -	-; -	peg.598; peg.701
			Folate to DHF to THF (EC: 1.5.1.3)	-	-	-	-	-	peg.1455	-	peg.1457
		Coenzyme A and derivatives		COMPLETE	COMPLETE	COMPLETE	COMPLETE	INCOMPLETE	INCOMPLETE	INCOMPLETE	COMPLETE
			Oxoisovalerine to pantoate (EC: 2.1.2.11; EC: 1.1.1.169/1.1.1.86)	peg.1528; peg.490 + peg.1827;	peg.1707; peg.969 + peg.2045	peg.595; peg.604 + peg.1057	peg.1384; peg.790 + peg.716	peg.531; peg.1464 + peg.882	-; -	-; peg.1195	peg.2601;peg.1907 + peg.2369
			Pantoate to CoenzymeA (EC: 6.3.2.1; EC: 2.7.1.33; EC: 6.3.2.5; EC: 4.1.1.36; EC: 2.7.7.3; EC: 2.7.1.24)	peg.1529; peg.1619; peg.868; peg.868; peg.1538; peg.417	peg.1706; peg.2171; peg.2064; peg.2064; peg.1448; peg.823	peg.596; peg.1708; peg.306; peg.306; peg.80; peg.1780	peg.1385; peg.619; peg.697; peg.697; peg.1148; peg.119	peg.530; peg.80; -; -; peg.1202; -	-; -; -; -; -; peg.1779	-; peg.100; -; -; -; -	peg.1602; peg.788 + peg.1892; peg.2604; peg.2604; peg.2191; peg.1910
		Thiamin pyrophosphate (TPP, vitamin B1)		INCOMPLET	INCOMPLET	INCOMPLETE	INCOMPLETE	INCOMPLETE	INCOMPLETE	INCOMPLETE	INCOMPLETE (?)
			Thiamin -or thamin precursor- transporter	-	-	-	-	-	-	peg.348	peg.494
			AIR to hydroxymethylpyrimidinePP (EC: 4.1.99.17; EC: 2.7.1.49; EC: 2.7.4.7	-; -; -	-; -; -	-; -; -	-; - ;-	-; - ;-	peg.2020; -; -	-; -; -	peg.755; -; peg.515
			4-methyl-5-(2-phosphoethyl)-thiazole biosynthesis	peg.107; -	-	peg.111; -	-	peg.1717; peg.138	peg.1944; -	-	peg.281 + peg.282; peg.2584; -
			Thiamin phosphate biosynthesis (EC: 2.5.1.3)	-	-	peg.1349	-	peg.691	-	-	peg.516
			Thiamin phosphate to TPP (EC: 2.7.4.16)	peg.858	peg.1965	peg.176	peg.2080	peg.1706	-	-	peg.1576
		Riboflavin (vitamin B2)		COMPLETE (?)	COMPLETE (?)	COMPLETE (?)	COMPLETE (?)	COMPLETE (?)	ABSCENT	ABSCENT	COMPLETE (?)
			GTP cyclohydrolase II EC: 3.5.4.25	peg.1264	peg.1192	peg.1097	peg.498	peg.1136	-	-	peg.332; peg.1167; peg.2124
			Diaminohydroxyphosphoribosylaminopyrimidine deaminase EC: 3.5.4.26	peg.149	peg.2063	peg.601	peg.698	peg.1591	-	-	peg.334; peg.2122
			5-amino-6-(5-phosphoribosylamino)uracil reductase EC: 1.1.1.193	peg.149	peg.2063	peg.601	peg.698	peg.1591	-	-	peg.334; peg.2122
			5-Amino-6-(5'-phosphoribitylamino)uracil phosphatase	-	-	-	-	-	-	-	-
			3,4-dihydroxy-2-butanone 4-phosphate synthase EC: 4.1.99.12	peg.1264	peg.1192	peg.1097	peg.498	peg.1136	-	-	peg.332; peg.2124
			6,7-dimethyl-8-ribityllumazine synthase EC: 2.5.1.78	peg.694	peg.585	peg.1109	peg.225	peg.1635	-	-	peg.331; peg.2125
			Riboflavin synthase eubacterial/eukaryotic EC: 2.5.1.9	peg.1263	peg.1191	peg.1098	peg.499	peg.1135	-	-	peg.333; peg.2123
		Nicotinamide derivatives		COMPLETE	COMPLETE	COMPLETE	COMPLETE	INCOMPLETE	ABSCENT	INCOMPLETE	COMPLETE
			Asparate to NAD+ (EC: 1.4.3.16 ; EC: 2.5.1.72 ; EC: 2.4.2.19 ; EC: 2.7.7.18 ; EC: 6.3.1.5)	peg.1633; peg.814; peg.1632; peg.372; peg.1669	peg.1018; peg.1291; peg.1017; peg.155; peg548	peg.92; peg.1052; peg.93; peg.1113; peg.1399	peg.377; peg.1005 + peg.1500 ; peg.376; peg.1745; peg.909	peg.683: peg.195; -; peg.1537; peg.895	-; -; -; -; -	-; -; -; peg.1009; peg.798	peg.2025; peg.322; peg.773; peg.1934; peg.746 + peg.1129
			Nicotinate to NAD+ (EC: 2.4.2.11 ; EC: 2.7.7.18 ; EC: 6.3.1.5)	- ; peg.372; peg.1669	- ; peg.155; peg548	-; peg.1113; peg.1399	-; peg.1745; peg.909	'-; peg.1537; peg.895	-; -; -	-; peg.1009; peg.798	peg.804 ; peg.1934; peg.746 + peg.1129
			Tryptophan to NAD+ (EC: 1.13.11.11/1.13.11.52 ; EC: 3.5.1.9 ; EC: 1.14.13.9; EC: 3.7.1.13 ; EC: 1.13.11.6 ; EC: 2.4.2.19 ; EC: 2.7.7.18 ; EC: 6.3.1.5)	-; -; -; -; -; peg.1632; peg.372; peg.1669	-; -; -; -; -; peg.1017; peg.155; peg548	-; -; -; -; -; peg.93; peg.1113; peg.1399	-; -; -; -; -; peg.376; peg.1745; peg.909	-; -; -; -; - ; -; peg.1537; peg.895	-; -; -; -; -; -; -; -	-; -; -; -; -; -; peg.1009; peg.798	-; -; -; -; -; peg.773; peg.1934; peg.746 + peg.1129
			NAD+ to NADP+; EC 2.7.1.23	peg.824	peg.1557	peg.1553	peg.1817	peg.966	-	peg.424	peg.653
		Pyridoxal5Phosphate (vitamin B6)		INCOMPLET	INCOMPLET	INCOMPLETE	INCOMPLETE	INCOMPLETE	INCOMPLETE	INCOMPLETE	INCOMPLETE (?)
			Erythrose4P to Pyridoxal5P (EC: 1.2.1.72; EC: 1.1.1.290; EC: 2.6.1.52; EC: 1.1.1.262; EC: 2.6.99.2; EC: 1.4.3.5)	peg.458; -; -; peg.568; peg.1651; -	peg.34; -; -; peg.77; peg.1251; -	peg.599; -; -; peg.6; -	peg.253; -; -; peg.2041; peg.965; -	peg.185; -; -; peg.558; peg.964; -	peg.773; -; -; -; -; -	peg.88; -; -; -; -; -	peg.1084 + peg.2064; -; peg.2002; -; -; -
			Pyridoxine or Pyridoxamine to Pyridoxal5P (EC: 2.7.1.35; EC: 1.4.3.5)	-; -	-; -	-; -	-; -	-; -	-; -	-;-	peg.1425 + peg.1591; -
			Pyridoxal to Pyridoxal5P (EC: 2.7.1.35)	-	-	-	-	-	-	-	peg.1425 + peg.1591
			Ribulose 5-phosphate and Glyceraldehyde-3-P to Pyridoxal5P (EC: 2.4.2.-)	-	-	-	-	-	-	-	peg.2254 + peg.556; peg.2253
		Cobalamin biosynthesis (vitamin B12) and derivatives		INCOMPLETE	INCOMPLETE	INCOMPLETE	INCOMPLETE	INCOMPLETE	INCOMPLETE	INCOMPLETE	INCOMPLETE (?)
			Glutamate to Uroporphyrinogen III (EC: 6.1.1.17; EC: 1.2.1.70; EC: 5.4.3.8; EC: 4.2.1.24; EC: 2.5.1.61; EC: 4.2.1.75)	peg.1568; -; -; -; -; -	peg.660; -; -; -; - ; -	peg.1202; -; -; -; -; -	peg.471; -; -; -; -; -	peg.1003; -; -; -; -; -	peg.1128; -; -; -; -; -	peg.1246; -; -; -; -; -	peg.296; peg.2157; peg.847; peg.846; peg.2158; peg.845
			Uroporphyrinogen III to Cob(II)yrinate diamine anaerobic (CobA; CysG; CbiK/CbiX; CbiL; CbiH, CbiF; CbiG; CbiD; CbiJ; CbiE; CbiT; CbiC; CbiA)	-;-;-;-;-;-;-;-;-;-;-;-;-	-;-;-;-;-;-;-;-;-;-;-;-;-	-;-;-;-;-;-;-;-;-;-;-;-;-	-;-;-;-;-;-;-;-;-;-;-;-;-	-;-;-;-;-;-;-;-;-;-;-;-;-	-;-;-;-;-;-;-;-;-;-;-;-;-	-;-;-;-;-;-;-;-;-;-;-;-;-	peg.845; peg.845; peg.499/peg.500; peg.2368; peg.2208; peg.220; -; -; peg.2209; peg.2210; peg.2210; peg.2212; peg.2211
			Uroporphyrinogen III to Cob(II)yrinate diamine aerobic (CobA; CobI; CobG; CobJ, CobM; CobF; CobK; CobL; CobH; CobB, CobN)	-;-;-;-;-;-;-;-;-;-;-	-;-;-;-;-;-;-;-;-;-;-	-;-;-;-;-;-;-;-;-;-;-	-;-;-;-;-;-;-;-;-;-;-	-;-;-;-;-;-;-;-;-;-;-	-;-;-;-;-;-;-;-;-;-;-	-;-;-;-;-;-;-;-;-;-;-	peg.845; peg.2368; -; peg.2208; peg.220; -; peg.2209; peg.2210; peg.2212; peg.2211; peg.1759+peg.1578
			Cob(II)yrinate diamine to Coenzyme B12 (BluB; CobA/CobO; CbiP/CobQ; CbiB/CobC; CobU/CobP; CobD; CbiB; CobT; CobC; CobS/CobV)	-; -; -; -; -; -;- ;-; -; -	peg.690; -; -; -; -; -; -; -; peg.1771 ;-	-; -; -; -; -; -;- ;-; -; -	-; -; -; -; -; -;-; -; peg.1326 ;-	-; peg.245 + peg.1275; -; -; -; -;- ;-; -; -	-; -; -; -; -; -;- ;-; -; -	-; -; -; -; -; -;- ;-; -; -	-; peg.574; peg.575; peg.2220; peg.2215; peg.181+peg.577; peg.2220; peg.2213; peg.2219; -
			Coenzyme B12 to Cobalamin (EC: 2.5.1.17)	-	-	-	-	peg.245; peg.1275	-	-	peg.574
	Nucleosides and nucleotides
		Purine and purine nucleosides biosynthesis		INCOMPLETE	INCOMPLETE	INCOMPLETE	INCOMPLETE	INCOMPLETE	INCOMPLETE	INCOMPLETE	COMPLETE
			Ribose-5-P to inosine monophosphate (IMP) (EC: 2.7.6.1; EC: 2.4.2.14; EC: 6.3.4.13; EC: 2.1.2.2; EC: 6.3.5.3; EC: 6.3.3.1; EC: 4.1.1.21; EC: 6.3.2.6; EC: 4.3.2.2; EC: 2.1.2.3; EC: 3.5.4.10)	peg.1226; -; peg.380; peg.186; -; -; -; -; peg.1315; peg.731; peg.731	peg.60; -; peg.818; peg.1278; -; -; -; -; peg.1026; peg.1404; peg.1404	peg.468; -; peg.1121 + peg.1717; peg.1718; -; -; -; -; peg.1457; peg.1185; peg.1185	peg.2058; -; peg.114; -; -; -; -; -; peg.385; peg.1103; peg.1103	peg.156; -; peg.614; peg.613; peg.671 + peg.672; peg.612; -; -; peg.278; peg.637; peg.637	-; -; -; -; -; -; -; -; -; -; -	peg.601; -; -; -; -; -; -; -; -; -; -	peg.400; peg.801 + peg.1090 + peg.2343; peg.348; peg.349; peg.1348; peg.350; peg.729; peg.206 + peg.1089; peg.802 + peg.1091; peg.1102 + peg.2011; peg.1102 + peg.2011
			AMP to adenosine to adenine (EC: 3.1.3.5; EC: 2.4.2.1; EC: 2.4.2.7)	peg.29 + peg.537; peg.843; peg.667	peg.302 + peg.303; peg.758; peg.158	peg.950 + peg.579 + peg.1149; peg.366; peg.1788	peg.1584 + peg.1585; peg.24 ; peg.1742	peg.510 + peg.581; -; peg.1491	-; peg.645; -	peg.196 + peg.426 + peg.1365; peg.439; peg.986	- ; peg.1904; peg.1338
			GMP to guanosine or to guanine (EC: 3.1.3.5 ; EC: 2.4.2.1; EC: 2.4.2.8)	peg.537; peg.843; peg.360	peg.303; peg.758; peg.906	peg.950 + peg.579 + peg.1149; peg.366; peg.873	peg.1585; peg.24; peg.1928	peg.510; -; -	-; peg.645; peg.1924	peg.196 + peg.426 + peg.1365; peg.439; peg.401	- ; peg.1904; peg.546 + peg.1888
			IMP-> AMP->ADP->ATP (EC: 6.3.4.4; EC: 4.3.2.2; EC:2.7.4.3; EC: 2.7.4.6 or EC: 2.7.1.40)	peg.455; peg.1315; peg.1576; peg.674	peg.287; peg.1026; peg.1373; peg.1119	peg.624; peg.1457; peg.721; peg.1148	peg.1600; peg.385; peg.1071; peg.568	-; peg.278; peg.1196; peg.643	-; -; peg.680; peg.340	-; -; peg.1268; -	peg.803 + peg.1782 + peg.2274; peg.802 + peg.1091; peg.79; peg.408
			IMP->XMP->GMP->GDP->GTP (EC: 1.1.1.205; EC: 6.3.4.1 or EC: 6.3.5.2; EC: 2.7.4.8 ; C: 2.7.4.6 or EC: 2.7.1.40)	-; -; peg.867; peg.674	-; peg.38; peg.357; peg.1119	-; - ;peg.305; peg.1148	-; -; peg.1514; peg.568	-; -; peg.52; peg.643	-; -; peg.1403; peg.340	peg.383; -; peg.774 + peg.808; -	peg.2599; peg.1812; peg.1694; peg.408
		Pyrimidines and pyrimidine nucleosides biosynthesis
			Glutamine to UMP (EC: 6.3.5.5; EC: 2.1.3.2; EC: 3.5.2.3; EC: 1.3.3.1; EC: 2.4.2.10; EC: 4.1.1.23)	-; -; -; -; -; peg.1747	-; -; -; -; -; -	-; -; -; -; -; -	-; -; -; -; -; -	-; -; -; -; peg.1334; -	-; -; -; -; -; -	-; -; -; -; -; -	peg.1462 + peg.1461 + peg.2252; peg.240; peg.719; peg.722 + peg.721 + peg.1467; peg.1546; peg.720
			UMP to Uracile (EC: 2.4.2.9)	peg.840	peg.1938	peg.63	peg.2110	peg.313	-	peg.934	peg.2255
			UMP to UTP or CMP to CTP (EC: 2.7.4.25 or EC: 2.7.4.22; EC: 2.7.4.6)	peg.1510; peg.674	-; peg.1119	-; peg.1148	-; peg.568	-; peg.643	peg.1635; peg.340	peg.687; -	peg.595 + peg.1654 + peg.1961 + peg.1992 + peg.988; -
			UTP to CTP (EC: 6.3.4.2)	peg.498	peg.751	peg.665	peg.33	peg.925	peg.1537	-	peg.465
			CMP to cytidine to cytosine or dTMP to thymidine to thymine	peg.29 + peg.537; -	peg.302 + peg.303; -	peg.950 + peg.579 + peg.1149; -	peg.1584 + peg.1585; -	peg.510 + peg.581; -	-; -	peg.196 + peg.426 + peg.1365; -	-; -
			Thymidine to dTMP todTDP to dTTP (EC: 2.7.1.21; EC: 2.7.4.9; EC: 2.7.4.6)	peg.1112; peg.492 + peg.493 + peg.1584; peg.674	-; peg.1803; peg.1119	peg.352; peg.606 + peg.607 + peg.1367; peg.1148	-; peg.1300; peg.568	-; peg.1200 + peg.1461 + peg.1462; peg.643	-; peg.395; peg.340	peg.342; peg.215; -	-; peg.417; -
			Uracile to dUTP (via dUMP and dUDP)	peg.843; peg.1112; peg.492 + peg.493 + peg.1584; peg.674	peg.758; -; peg.1803; peg.1119	peg.366; peg.352; peg.607 + peg.606 + peg.1367; peg.1148	peg.24; -; peg.1300; peg.568	-; -; peg1200 + peg.1461 + peg.1462; peg.643	peg.645; -; peg.395; peg.340	peg.439; peg.342; peg.215; -	peg.1904; -; peg.417; -
		NDP to NTP to dNTP (EC: 2.7.4.6; EC: 1.17.4.2)		peg.674; peg.1002	peg.1119; peg.1351	peg.1148; peg.1290	peg.568; peg1053	peg.643; peg1812	peg.340; peg.1951	-; peg.573	-; peg.207 + peg.829 + peg.1115
	Other
		Polyphosphate accumulation		INCOMPLETE	INCOMPLETE	INCOMPLETE	INCOMPLETE	INCOMPLETE	INCOMPLETE	INCOMPLETE	INCOMPLETE
			Low-affinity inorganic phosphate transporter (PiT)	peg.1235	peg.915	-	peg.1919	peg.654	peg.1394	peg.734	-
			Polyphosphate kinase	-	-	-	-	-	-	-	peg.601; peg.2015
			Exopolyphosphatase	peg.1012	-	peg.1260	-	peg.1615	peg.1559; peg.1560	-	peg.600
			Polyphosphate:AMP phosphotransferase	-	-	-	-	-	-	-	-
			Adenylate kinase	peg.1576	peg.1373	peg.721	peg.1071	peg.398; peg.1196	peg.680	peg.1268	peg.79
		Polyhydroxyalkanoate accumulation		INCOMPLETE	INCOMPLETE	INCOMPLETE	INCOMPLETE	INCOMPLETE	INCOMPLETE	INCOMPLETE	COMPLETE
		Terpenoid backbone biosynthesis		COMPLETE	COMPLETE	COMPLETE	COMPLETE	INCOMPLETE	INCOMPLETE	COMPLETE	COMPLETE
			(MEP/DOXP pathway: Glyceraldehyde-3-phosphate and pyruvate to Isopentenyl-PP (EC: 2.2.1.7; EC:1.1.1.267; EC: 2.7.7.60; EC: 2.7.1.148; EC: 4.6.1.12; EC: 1.17.7.1; EC: 1.17.1.2)	peg.1700; peg.1297; peg.857; peg.1270; peg.1231; peg.1754; peg.818	peg.326 + peg.1112; peg.1986; peg.1500 + peg.1966; peg.1242; peg.121; peg.2102; peg.1436	peg.1286; peg.894; peg.175 + peg.1254; peg.349; peg.173; peg.569 , peg.1101	peg.575 + peg.1547; peg.2060; peg.1762 + peg.2079; peg.957; peg.1995; peg.660; peg.1136	peg.143; peg.483; peg.1705; peg.1755; peg.909; -; peg.201	peg.579; -; -; -; -; -; -	peg.866; peg.167; peg.644; peg.599; peg.330; peg.993; peg.983	peg.651 + peg.1830; peg.1671; peg.135 + peg.974 + peg.1284; peg.1232; peg.1023 + peg.1469; peg.1669; peg.1655
			Mevaloate pathway: Acetyl-CoA and Acetoacetyl-CoA to Isopentenyl-PP (EC: 2.3.3.10; EC: 1.1.1.34; EC: 2.7.1.36; EC: 2.7.4.2; EC: 4.1.1.33)	-; -; -; -; -	-; -; -; -; -	-; -; -; -; -	-; -; -; -; -	-; -; -; -; -	-; -; -; -; -	'-; -; -; -; -	-; -; -; -; -
